# Supplementary material
Source: PubMed Central journal article supplement (PMC3720125)
Supplement: NIHMS481463-supplement-Supplemental_data.pdf [file NIHMS481463-supplement-Supplemental_data.pdf]

## Supplementary Materials for **Rapamycin Prevents Seizures After Depletion of STRADA in a Rare Neurodevelopmental Disorder**

Whitney E. Parker, Ksenia A. Orlova, William H. Parker, Jacqueline F. Birnbaum,  
Vera P. Krymskaya, Dmitry A. Goncharov, Marianna Baybis, Jelte Helfferich,  
Kei Okochi, Kevin A. Strauss, Peter B. Crino\*

\*Corresponding author. E-mail: peter.crino@temple.edu

Published 24 April 2013, *Sci. Transl. Med.* **5**, 182ra53 (2013)  
DOI: 10.1126/scitranslmed.3005271

### **This PDF file includes:**

Fig. S1. The pathway schematic illustrates STRADA signaling through mTORC1.  
Fig. S2. Ara-C mitotic inhibition demonstrates migration deficit with STRADA depletion and rescue with rapamycin.  
Fig. S3. Golgi compaction indicates polarity in migrating cells.  
Fig. S4. PMSE patient fibroblasts display evidence of aberrant mTORC1 activation.  
Fig. S5. Co-immunolabeling with giantin antibody confirms Golgi-specific GM130 stain.  
Table S1. Summary of quantitative and statistical measures corresponding to figures in the text.  
Table S2. Clinical features of historical control PMSE patients.  
Legends for Movies S1 to S3

### **Other Supplementary Material for this manuscript includes the following:**

(available at [www.sciencetranslationalmedicine.org/cgi/content/full/5/182/182ra53/DC1](http://www.sciencetranslationalmedicine.org/cgi/content/full/5/182/182ra53/DC1))

Movie S1 (.avi format). Control mNPCs treated with scrambled shRNA display a uniform linear pattern of migration.  
Movie S2 (.avi format). STRADA-depleted mNPCs exhibit disrupted pathfinding.  
Movie S3 (.avi format). Rapamycin rescues pathfinding defect in STRADA-depleted mNPCs.

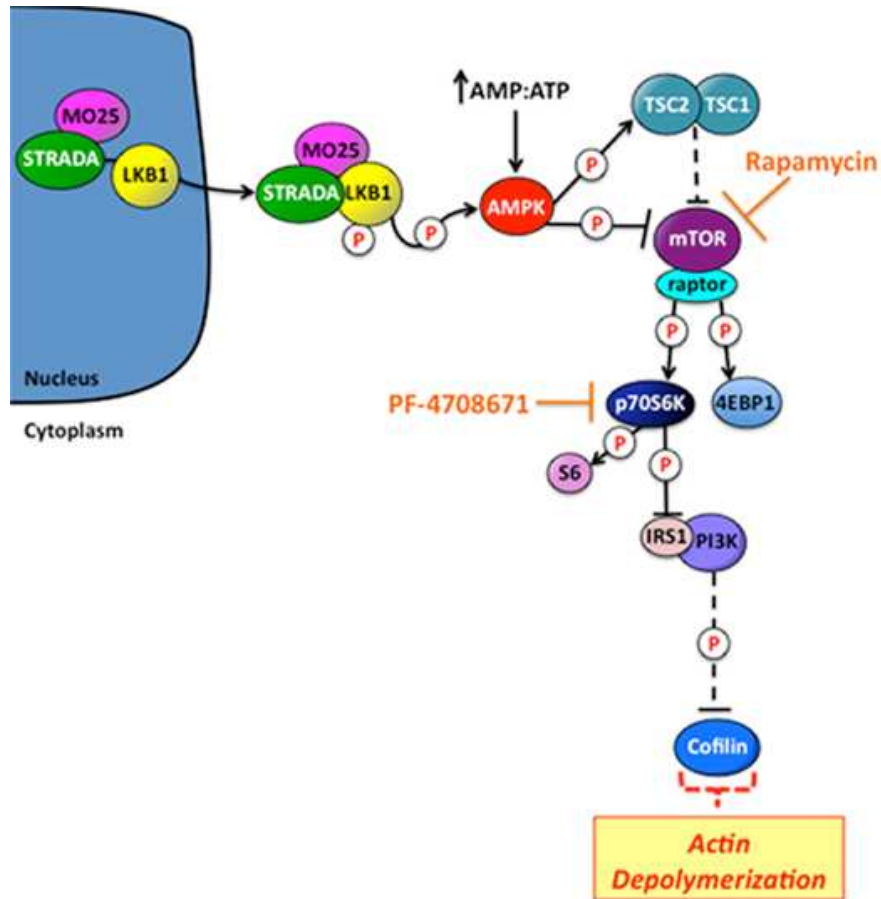

**Fig. S1.** The pathway schematic illustrates STRADA signaling through mTORC1. STRADA and scaffolding protein MO25 bind LKB1 and shuttle it out of the nucleus and activate its kinase activity toward AMPK. AMPK, activated by LKB1 phosphorylation as well as a high ratio of AMP:ATP indicating low cellular energy, phosphorylates and activates TSC2. TSC2 complexes with TSC1 to inhibit mTOR signaling. mTOR can form two complexes, the rapamycin-sensitive mTORC1 or the rapamycin-insensitive mTORC2. mTORC1 phosphorylates and activates 4EBP1 and p70S6K, which phosphorylates S6 and IRS1 (*16*). Downstream of IRS1, cofilin phosphorylation has an inverse relationship to mTORC1 activity. Thus, depletion of STRADA would be expected to result in disinhibited mTORC1 and consequently, enhanced phosphorylation of S6, 4EBP1, and IRS1, and diminished phosphorylation of cofilin. Importantly, rapamycin inhibits mTORC1 and PF-4708671 (p70S6Ki) inhibits p70S6K.

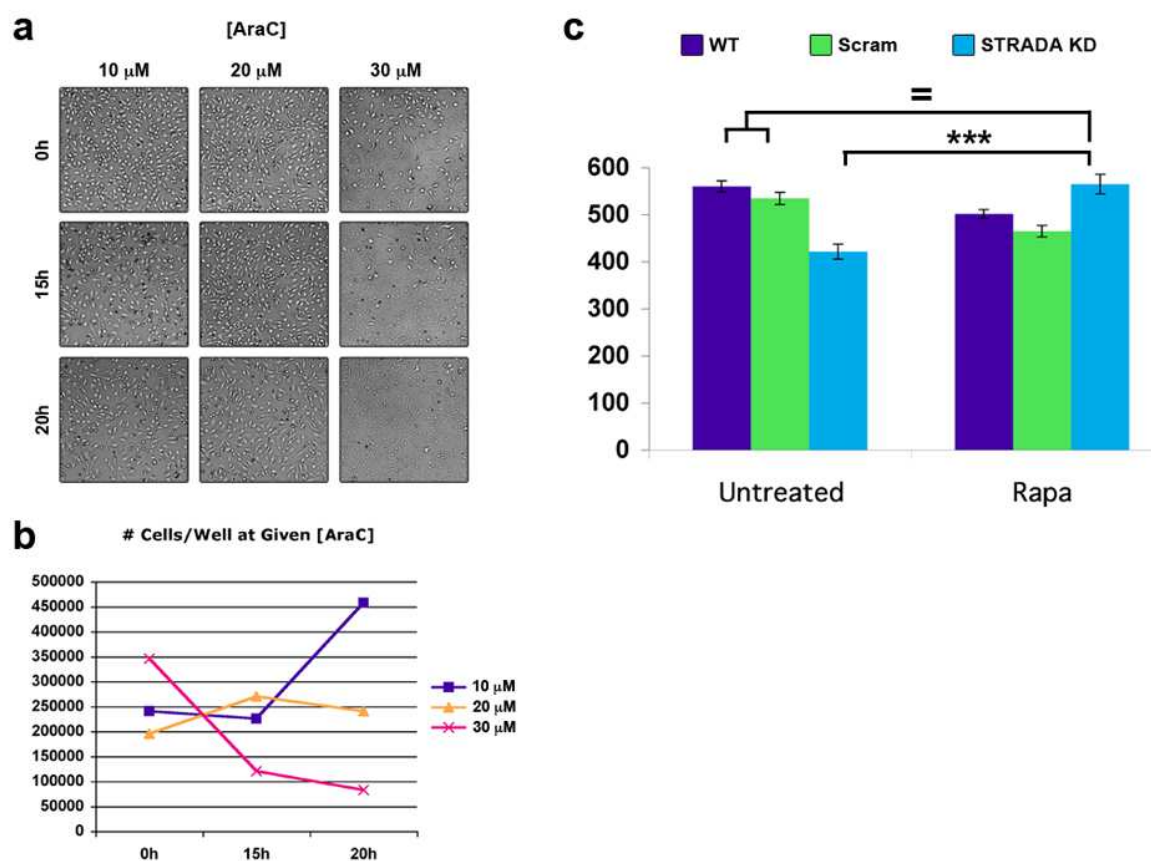

**Fig. S2.** Ara-C mitotic inhibition demonstrates migration deficit with STRADA depletion and rescue with rapamycin. (**A**, **B**) The mitotic inhibitor arabinofuranosyl cytosine (Ara-C) was used to inhibit mitosis of migrating cells and thus eliminate this as a variable affecting gap closure in the wound-healing migration assay. Scale bar, 250  $\mu$ m. Effective non-lethal Ara-C dose was established through microscopic visualization (**A**) and Trypan Blue (Sigma) cell counts (**B**) at 0h, 15h, and 20h (each following a 24-hour pre-treatment) of Ara-C treatment at indicated doses, and 20  $\mu$ M was determined to be the optimal effective anti-proliferative, non-apoptotic Ara-C dose. (**C**) Wound-healing migration assays were performed with 24-hour pre-treatment with Ara-C on wildtype untransfected (WT), Scrambled, and STRADA knockdown mNPCs. With Ara-C treatment, STRADA knockdown mNPCs exhibited migration defect, rescued fully with rapamycin treatment.  $n = 3$  wells, 90 measures per condition at each timepoint, \*\*\* $P < 0.001$ , = $P > 0.05$ .

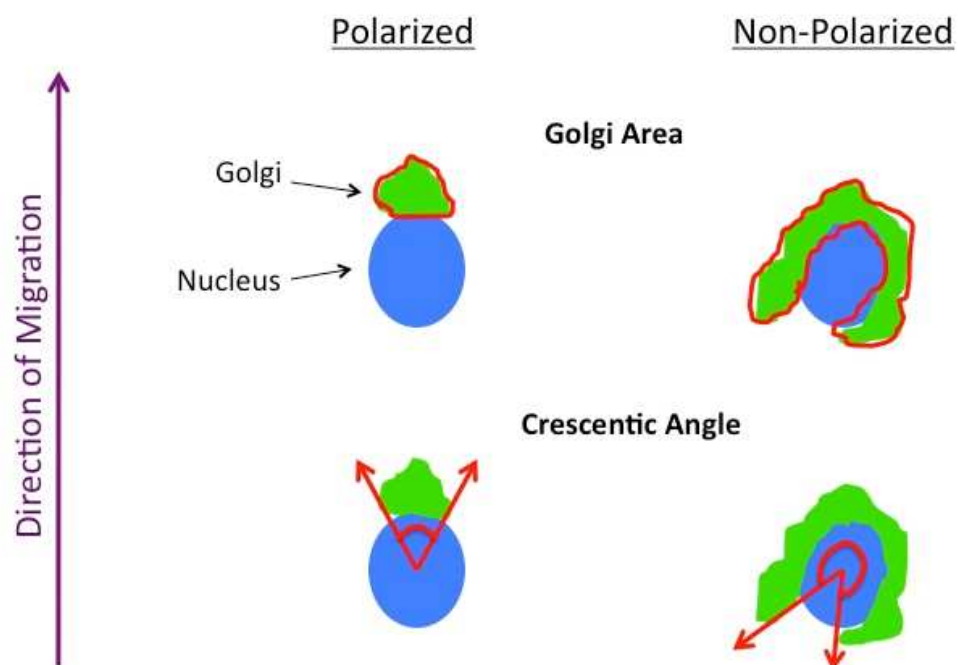

**Fig. S3.** Golgi compaction indicates polarity in migrating cells. Polarized migrating cells exhibit Golgi that is compacted forward of the nucleus, in the direction of migration. Left, this is indicated by reduced Golgi area and reduced crescentic angle subtended by Golgi around the nucleus. In contrast, non-polarized cells (right) exhibit increased Golgi area and increased angle around the nucleus.

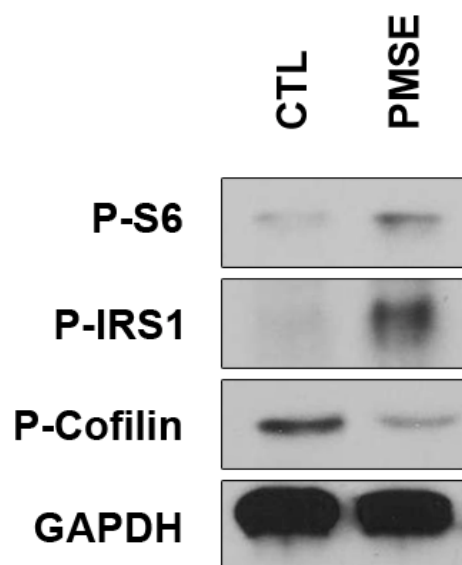

**Fig. S4.** PMSE patient fibroblasts display evidence of aberrant mTORC1 activation. PMSE patient fibroblasts (PMSE; *STRADA*<sup>-/-</sup>) exhibit enhanced phosphorylation of S6 and IRS1, and diminished phosphorylation of cofilin, relative to control (CTL; *STRADA*<sup>+/+</sup>) fibroblasts, supporting the mechanism established in *STRADA* knockdown mNPCs. GAPDH serves as an internal loading control.

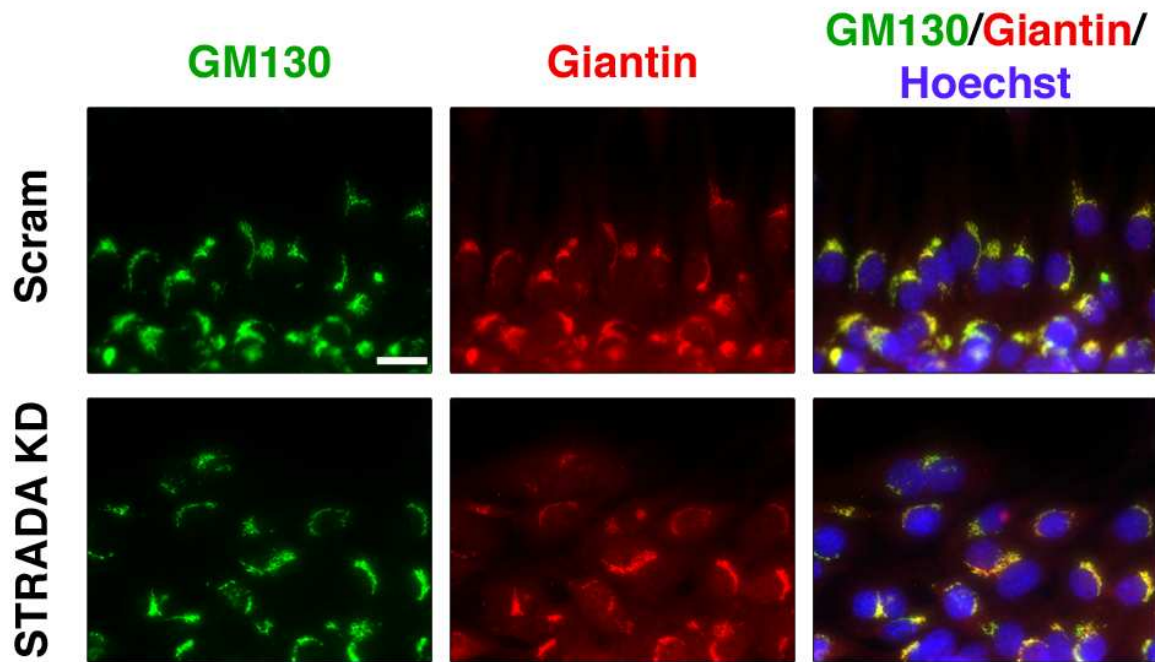

**Fig. S5.** Co-immunolabeling with giantin antibody confirms Golgi-specific GM130 stain. To ensure Golgi specificity of our GM130 stain, we co-labeled for GM130 (green, in the first column) and a second Golgi marker, giantin (red, in the second column), and ensured co-localization of the two markers (yellow, in the third column overlay). Scale bar, 50  $\mu$ m.

**Table S1.** Summary of quantitative and statistical measures corresponding to figures in the text.

| Corresponding Figure | Cell Type            | Condition | Treatment                        | Mean    | S.E.M. | Unit Measured      | n                    | Comparison                                | p-value  |
|----------------------|----------------------|-----------|----------------------------------|---------|--------|--------------------|----------------------|-------------------------------------------|----------|
| <b>1D</b>            | mNPCs                | Scram     | Untreated                        | 313.62  | 3.67   | μm                 | 3 wells, 90 measures | Scram vs. STRADA KD-untreated             | <0.00001 |
|                      |                      |           | STRADA KD Untreated              | 244.77  | 4.42   | μm                 | 3 wells, 90 measures | STRADA KD-untreated vs. STRADA KD-Rapa    | 0.000016 |
|                      |                      |           | Rapamycin (50 nM)                | 268.4   | 9.03   | μm                 | 3 wells, 90 measures |                                           |          |
| <b>1E</b>            | mNPCs                | Scram     | Untreated                        | 135.99  | 3.61   | μm                 | 3 wells, 90 measures | Scram vs. STRADA KD-untreated             | <0.00001 |
|                      |                      |           | STRADA KD Untreated              | 113.66  | 2.9    | μm                 | 3 wells, 90 measures | Scram vs. STRADA KD-p70S6Ki               | 0.74     |
|                      |                      |           | p70S6Ki (10 μM)                  | 134.35  | 2.51   | μm                 | 3 wells, 90 measures |                                           |          |
| <b>2B</b>            | mNPCs                | Scram     | Untreated                        | 508.59  | 26.63  | μm                 | 20 cells             | Scram vs. STRADA KD                       | <0.00001 |
|                      |                      |           | STRADA KD Untreated              | 688.74  | 64.13  | μm                 | 15 cells             |                                           |          |
| <b>2C</b>            | mNPCs                | STRADA KD | Untreated                        | 397.46  | 23.89  | μm                 | 20 cells             | STRADA KD-untreated vs. STRADA KD-Rapa    | 0.0001   |
|                      |                      |           | Rapamycin (50 nM)                | 348.31  | 21.98  | μm                 | 20 cells             |                                           |          |
| <b>2D</b>            | mNPCs                | Scram     | Untreated                        | 784.88  | 92.93  | degrees^2          | 20 cells             | Scram vs. STRADA KD                       | <0.00001 |
|                      |                      |           | STRADA KD Untreated              | 2050.1  | 129.39 | degrees^2          | 15 cells             |                                           |          |
| <b>2E</b>            | mNPCs                | STRADA KD | Untreated                        | 2254.38 | 111.08 | degrees^2          | 20 cells             | STRADA KD-untreated vs. STRADA KD-Rapa    | <0.00001 |
|                      |                      |           | Rapamycin (50 nM)                | 1481.8  | 84.12  | degrees^2          | 20 cells             |                                           |          |
| <b>2J</b>            | mNPCs                | Scram     | Untreated                        | 78.83   | 1.33   | μm^2               | 640 cells            | Scram vs. STRADA KD-untreated             | <0.00001 |
|                      |                      |           | STRADA KD Untreated              | 98.8    | 1.95   | μm^2               | 600 cells            | STRADA KD-untreated vs. STRADA KD-Rapa    | 0.00204  |
|                      |                      |           | STRADA KD Rapamycin (50 nM)      | 88.66   | 2.51   | μm^2               | 300 cells            | STRADA KD-untreated vs. STRADA KD-p70S6Ki | <0.00001 |
|                      |                      |           | STRADA KD p70S6Ki (10 μM)        | 77.87   | 1.94   | μm^2               | 360 cells            | Scram vs. STRADA KD-p70S6Ki               | 0.67     |
| <b>2K</b>            | mNPCs                | Scram     | Untreated                        | 98.56   | 1.86   | degrees            | 640 cells            | Scram vs. STRADA KD-untreated             | <0.00001 |
|                      |                      |           | STRADA KD Untreated              | 112.82  | 2.35   | degrees            | 600 cells            | STRADA KD-untreated vs. STRADA KD-Rapa    | 0.037    |
|                      |                      |           | STRADA KD Rapamycin (50 nM)      | 104.93  | 2.56   | degrees            | 300 cells            | STRADA KD-untreated vs. STRADA KD-p70S6Ki | 0.033    |
|                      |                      |           | STRADA KD p70S6Ki (10 μM)        | 104.86  | 2.8    | degrees            | 360 cells            |                                           |          |
| <b>3E</b>            | mNPCs <i>in vivo</i> | STRADA KD | Vehicle Control (saline)         | 26.35   | 5.37   | % GFP+ cells in CP | 5 animals            | Vehicle Control vs. Rapamycin-treated     | 0.000051 |
|                      |                      |           | Rapamycin (5 mg/kg)              | 67.78   | 2.8    | % GFP+ cells in CP | 6 animals            |                                           |          |
| <b>4F</b>            | Hu Fibroblasts       | CTL       | Untreated                        | 231.71  | 6.97   | μm                 | 3 wells, 90 measures | CTL vs. PMSE-untreated                    | 0.0019   |
|                      |                      |           | PMSE Untreated                   | 201.55  | 6.14   | μm                 | 3 wells, 90 measures | PMSE-untreated vs. PMSE-Rapa              | <0.00001 |
|                      |                      |           | PMSE Rapamycin (100 nM)          | 269.29  | 9.54   | μm                 | 3 wells, 90 measures | PMSE-untreated vs. PMSE-p70S6Ki           | <0.00001 |
|                      |                      |           | PMSE p70S6Ki (10 μM)             | 285.75  | 7.58   | μm                 | 3 wells, 90 measures |                                           |          |
| <b>S2</b>            | mNPCs                | WT        | AraC only                        | 560.05  | 11.66  | μm                 | 3 wells, 90 measures | WT-AraC vs. Scram AraC                    | 0.14     |
|                      |                      |           | Scram AraC only                  | 534.61  | 13.13  | μm                 | 3 wells, 90 measures | Scram-AraC vs. STRADA KD-AraC             | <0.00001 |
|                      |                      |           | STRADA KD AraC only              | 421.47  | 15.68  | μm                 | 3 wells, 90 measures | STRADA KD-AraC vs. STRADA KD-AraC+Rapa    | <0.00001 |
|                      |                      |           | STRADA KD AraC+Rapamycin (50 nM) | 564.65  | 20.83  | μm                 | 3 wells, 90 measures | Scram-AraC vs. STRADA KD-AraC+Rapa        | 0.2      |

**Table S2.** Clinical features of historical control PMSE patients. CPS, complex partial seizures; GTCS, generalized tonic-clonic seizures; EPC, epilepsy partialis continua; SE, status epilepticus; DQ, developmental quotient.

| Cases | Ages         | Seizure Onset before age 7 mos | Patients with seizures at least monthly | Seizure Types                        | Infantile Spasms (%) | Mortality | Average DQ |
|-------|--------------|--------------------------------|-----------------------------------------|--------------------------------------|----------------------|-----------|------------|
| 16    | 7 mos-28 yrs | 100%                           | 100%                                    | CPS, GTCS, EPC, SE, Seizure Clusters | 2 (12%)              | 6 (38%)   | 0.2        |

**Table S2.** Clinical features of historical control PMSE patients. CPS, complex partial seizures; GTCS, generalized tonic-clonic seizures; EPC, epilepsy partialis continua; SE, status epilepticus; DQ, developmental quotient.

Movie S1. Control mNPCs treated with scrambled shRNA display a uniform linear pattern of migration.

Movie S2. STRADA-depleted mNPCs exhibit disrupted pathfinding.

Movie S3. Rapamycin rescues pathfinding defect in STRADA-depleted mNPCs.
